# Supplementary material
Source: Springer Nature journal article supplement (https://www.springermedizin.de/resource/supplementary/13031_2006_2_MOESM1_ESM.pdf/9644910)

**Number of Events**

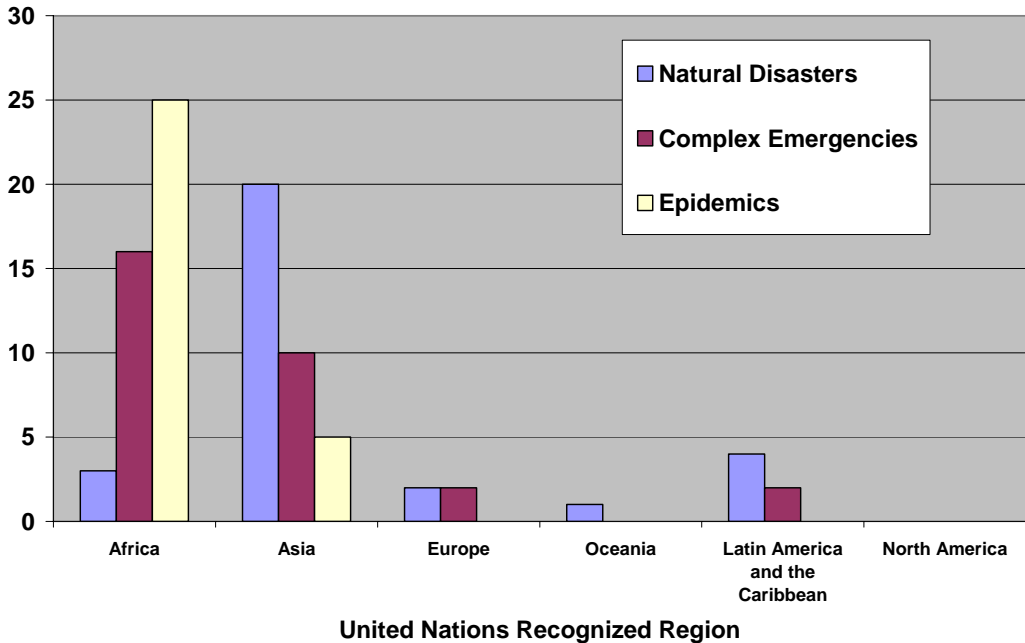

Supplement: MOESM1 [file 9644910]
